# Supplementary material
Source: Springer Nature journal article supplement (https://www.springermedizin.de/resource/supplementary/13018_2006_8_MOESM4_ESM.pdf/9636156)
Supplement: MOESM4 [file 9636156]

### Caudal Lateral Tibial Plateau

Col 1 MMP-13 Cox-2 TIMP-2  
Col 2

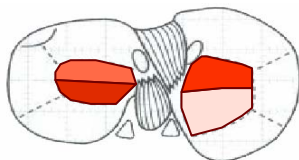

### Caudal Medial Tibial Plateau

Col 1 MMP-13 Cox-2 TIMP-2  
Col 2 ADAMTS 5 INOS

### Cranial Lateral Tibial Plateau

Col 1 MMP-13 Cox-2 TIMP-1  
Col 2 MMP-3 INOS  
ADAMTS 5

### Cranial Medial Tibial Plateau

MMP-13

**A**

### Cranial Lateral Femoral Condyle

MMP-13 Cox-2

**R**

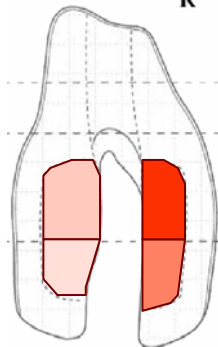

### Cranial Medial Femoral Condyle

Col 1 MMP-13 Cox-2 TIMP-1  
Agg MMP-3  
\*ADAMTS 5

### Caudal Lateral Femoral Condyle

Agg

### Caudal Medial Femoral Condyle

Col 1 MMP-13 Cox-2  
ADAMTS 5

**B**
